# Supplementary material for: Polybenzimidazole-based mixed membranes with exceptionally high water vapor permeability and selectivity
Source: Royal Society of Chemistry journal article supplement (doi:10.1039/c7ta05081j), 2017-01-01
Supplement: c7ta05081j1.pdf [file c7ta05081j1.pdf]

## Supporting Information

Polybenzimidazole-based mixed membranes with exceptional high water vapor permeability and selectivity

<sup>1</sup>Faheem Hassan Akhtar, <sup>1</sup>Mahendra Kumar, <sup>1</sup>Luis Francisco Villalobos, <sup>2</sup>Hakkim Vovusha,  
<sup>1</sup>Rahul Shevate, <sup>2</sup>Udo Schwingenschlögl, <sup>1</sup>Klaus-Viktor Peinemann\*

<sup>1</sup>Advanced Membranes and Porous Materials Center, 4700 King Abdullah University of Science and Technology (KAUST), Thuwal 23955-6900, Kingdom of Saudi Arabia

<sup>2</sup>Physical Science and Engineering Division (PSE), 4700 King Abdullah University of Science and Technology (KAUST), Thuwal 23955-6900, Kingdom of Saudi Arabia

\*Email: klausviktor.peinemann@kaust.edu.sa

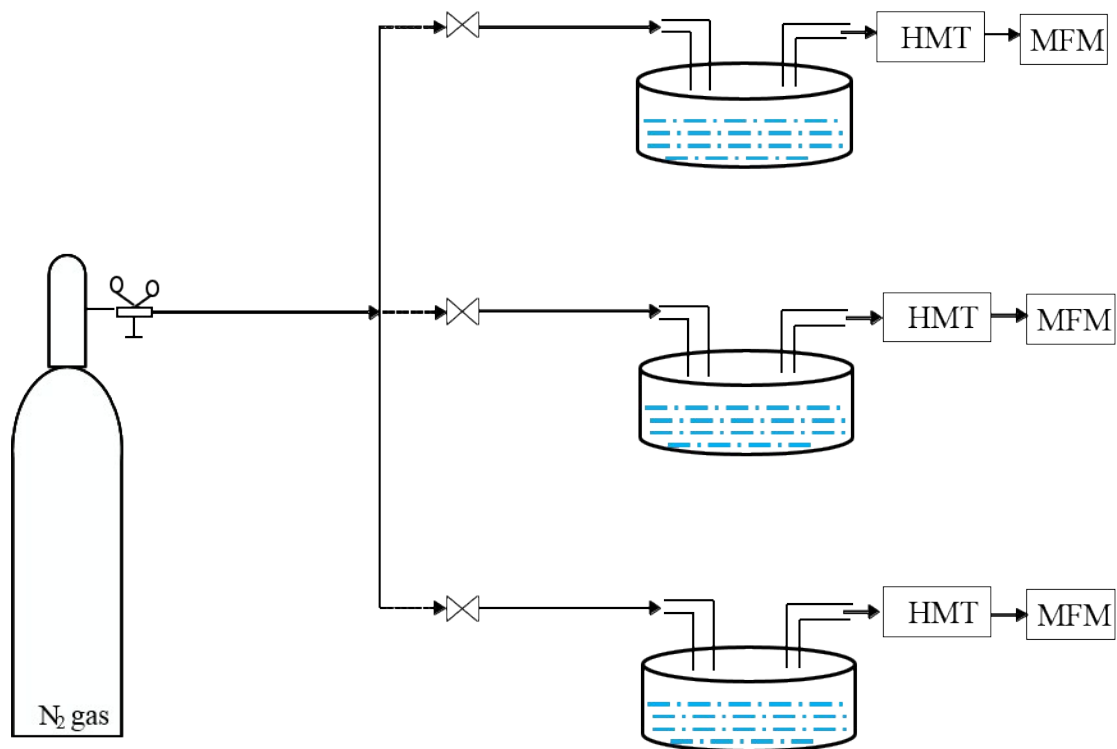

**Figure S1:** Schematic presentation for measuring water vapor permeation through the mixed matrix membranes. Humidity & temperature sensor (HMT) and mass flow meter (MFM).

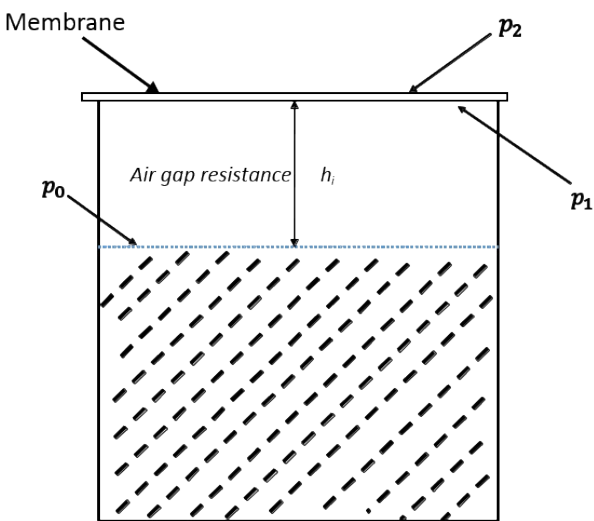

**Figure S2:** Schematic diagram for apparent and actual water vapor pressure values obtained from a water vapor permeability cup.

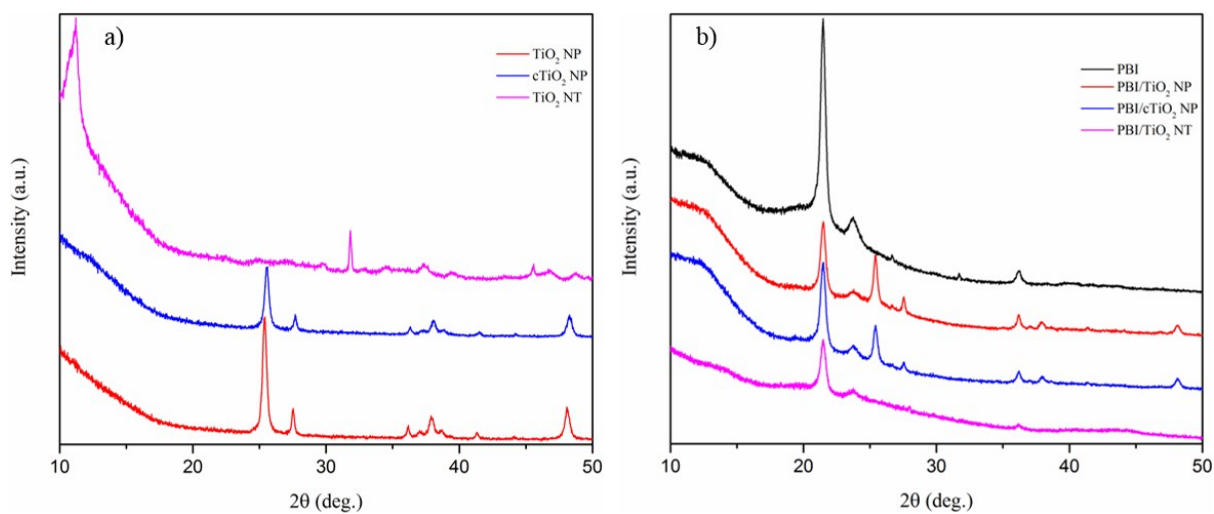

**Figure S3:** The WXR D pattern for: a) TiO<sub>2</sub> nanoparticles, carboxylated TiO<sub>2</sub> (cTiO<sub>2</sub>) nanoparticles and TiO<sub>2</sub> nanotubes; b) PBI and the mixed matrix membranes containing the fixed amount of TiO<sub>2</sub> nanoparticles, cTiO<sub>2</sub> nanoparticles and TiO<sub>2</sub> nanotubes.

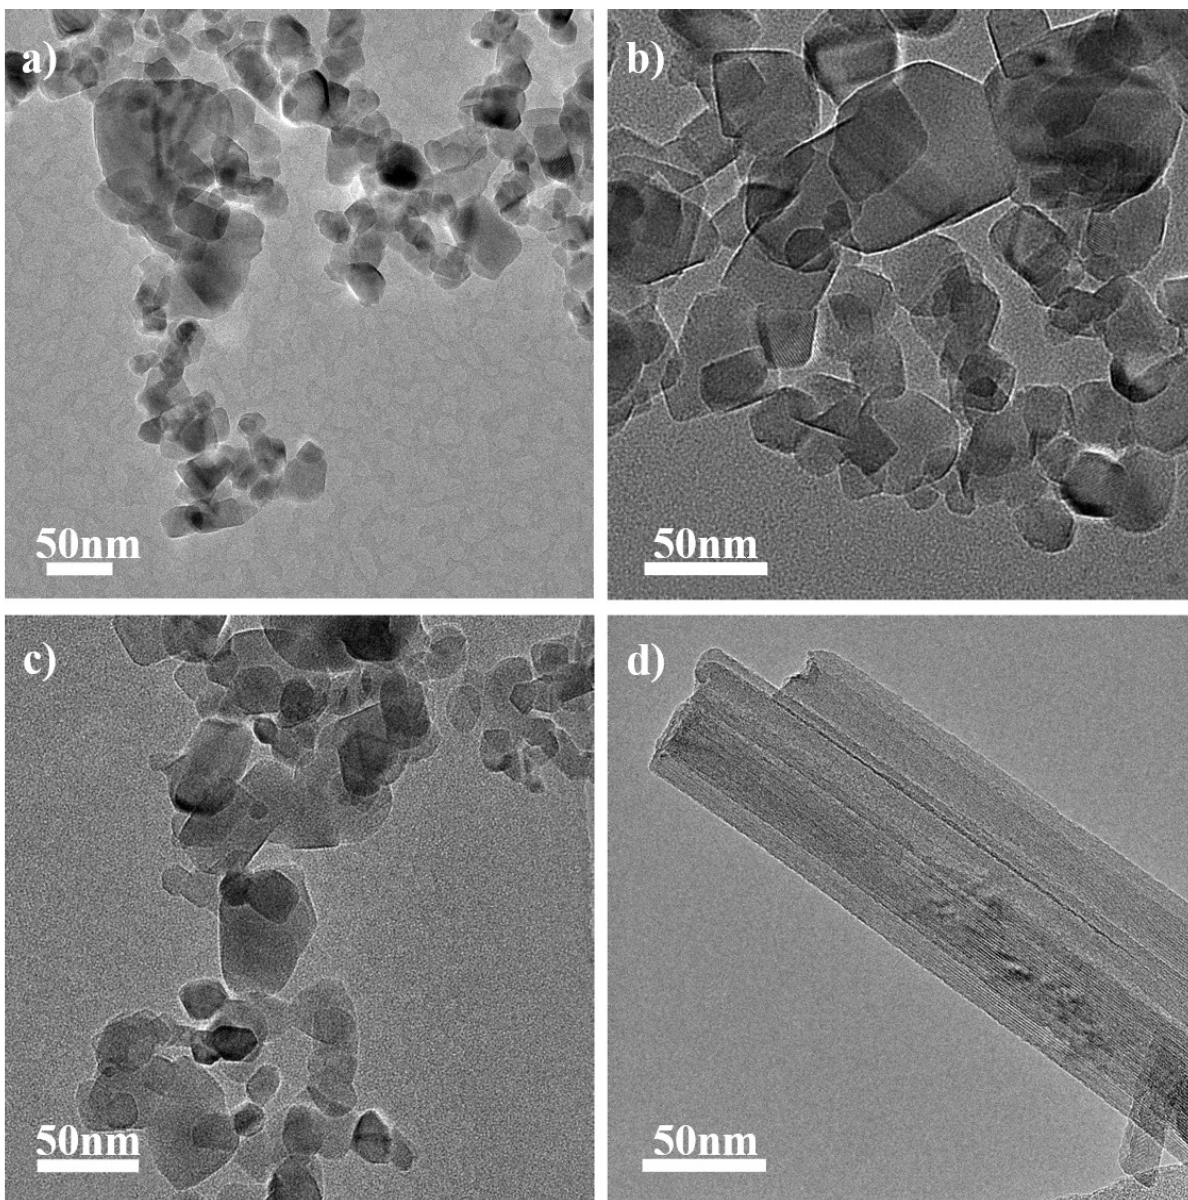

**Figure S4:** TEM images for: a)  $\text{TiO}_2$  nanoparticles; b) alkali treated  $\text{TiO}_2$  nanoparticles; c) carboxylated  $\text{TiO}_2$  ( $\text{cTiO}_2$ ) nanoparticles and d)  $\text{TiO}_2$  nanotubes.

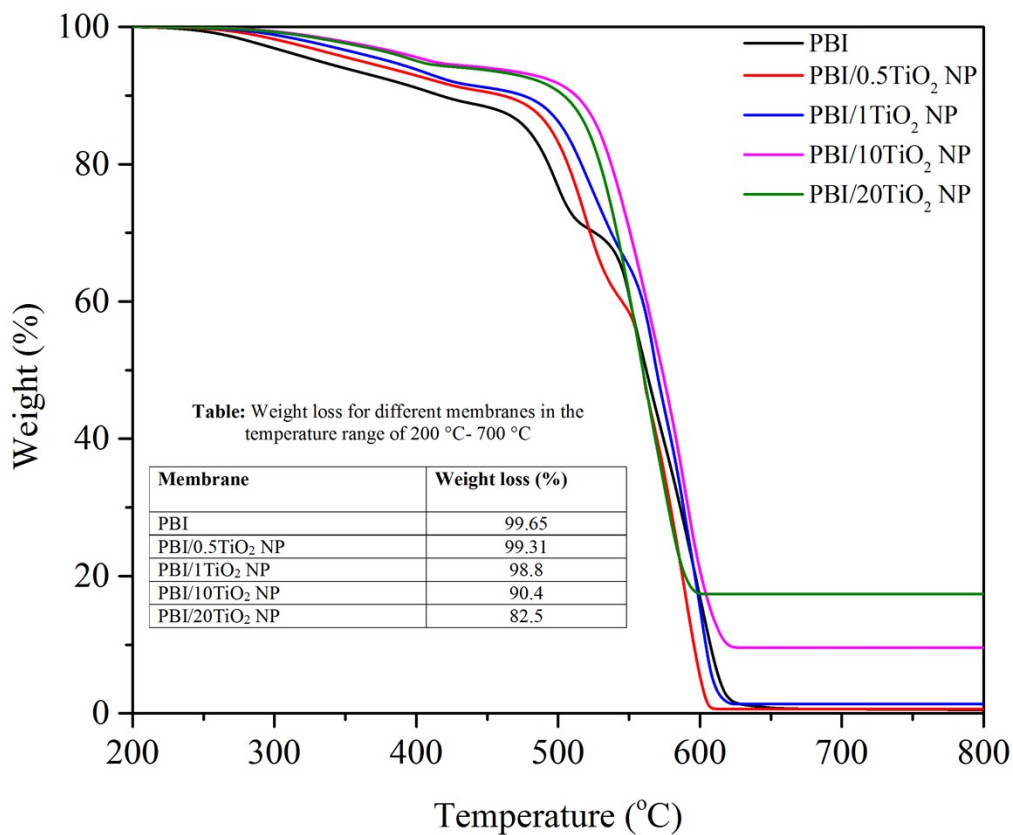

**Figure S5:** TGA for the mixed matrix membranes with varied amounts of TiO<sub>2</sub> nanoparticles. Inset table shows the weight loss observed for different membranes in the temperature range of 200 °C-700 °C.

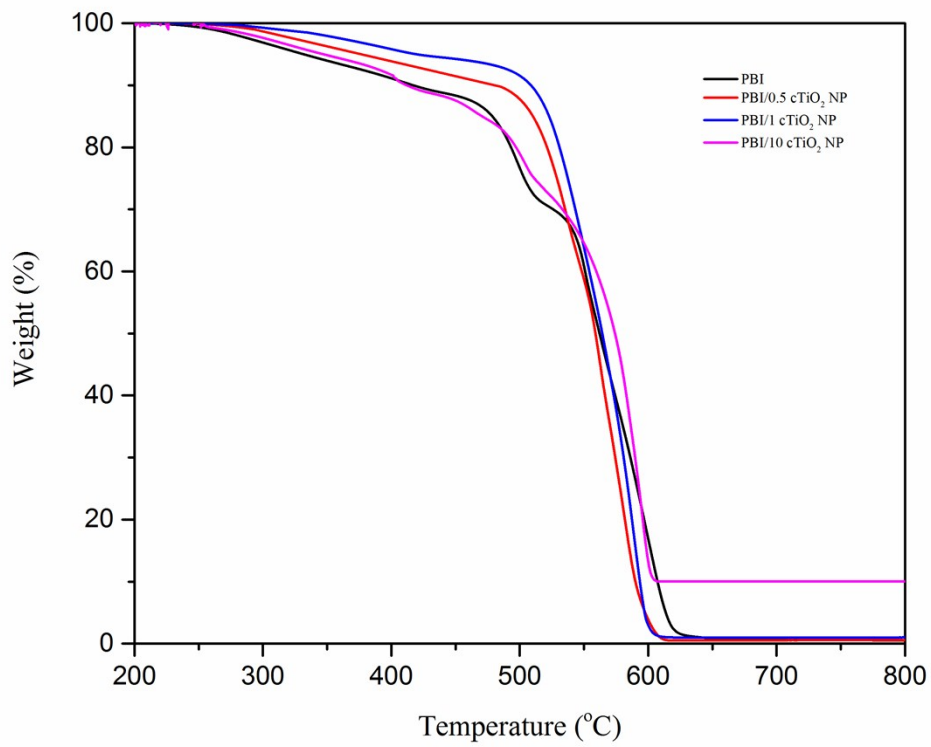

**Figure S6:** TGA of the mixed matrix membranes with varied amounts of carboxylic acid functionalized TiO<sub>2</sub> nanoparticles.

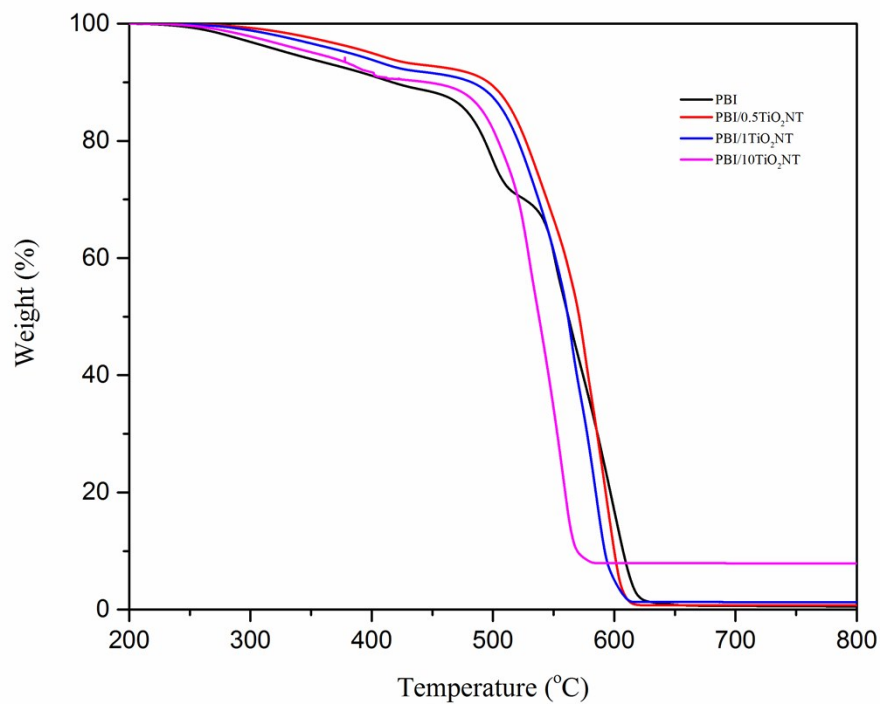

**Figure S7:** TGA of the mixed matrix membranes with varied amounts of TiO<sub>2</sub> nanotubes.

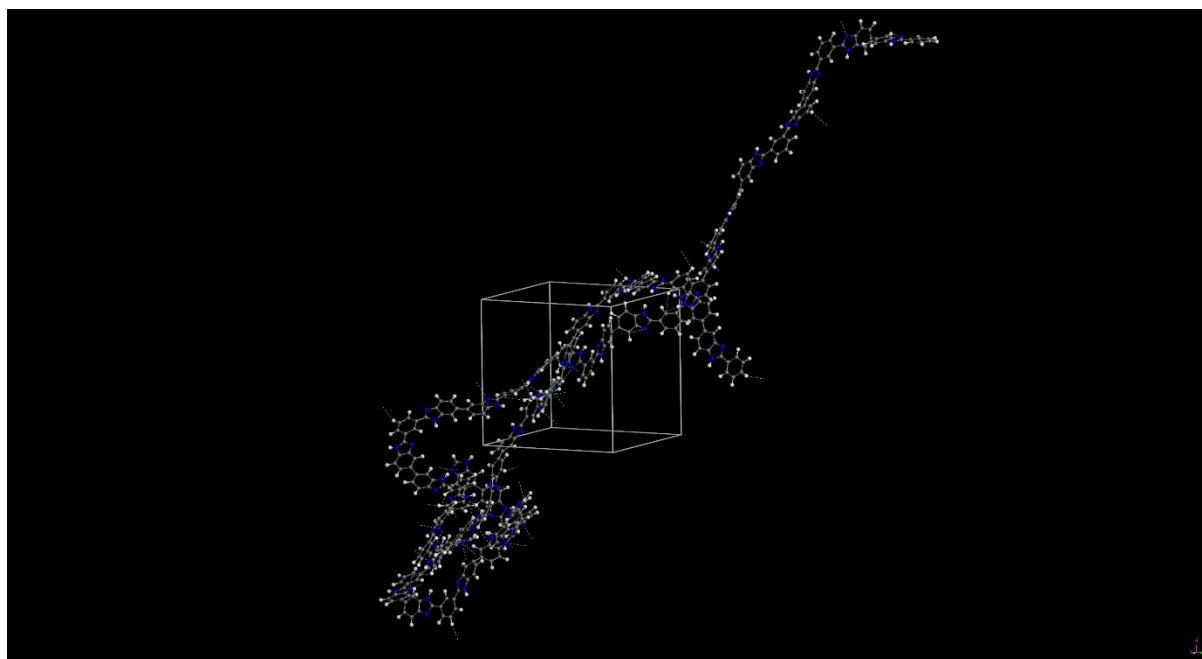

**Figure S8:** Hydrogen bond network formed in pure PBI, snapshots from MD simulations showing the H-bonds.

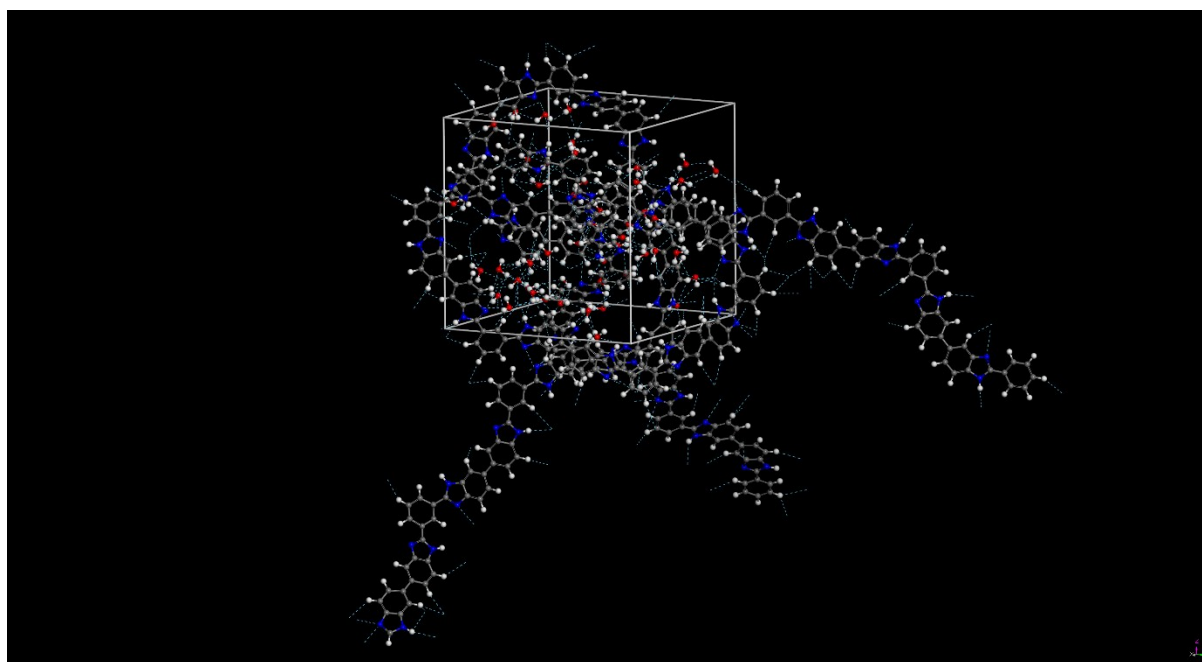

**Figure S9:** Hydrogen bond network formed in PBI-water cluster when water vapor activity  $a=0.6$ , snapshots from MD simulations showing the H-bonds.



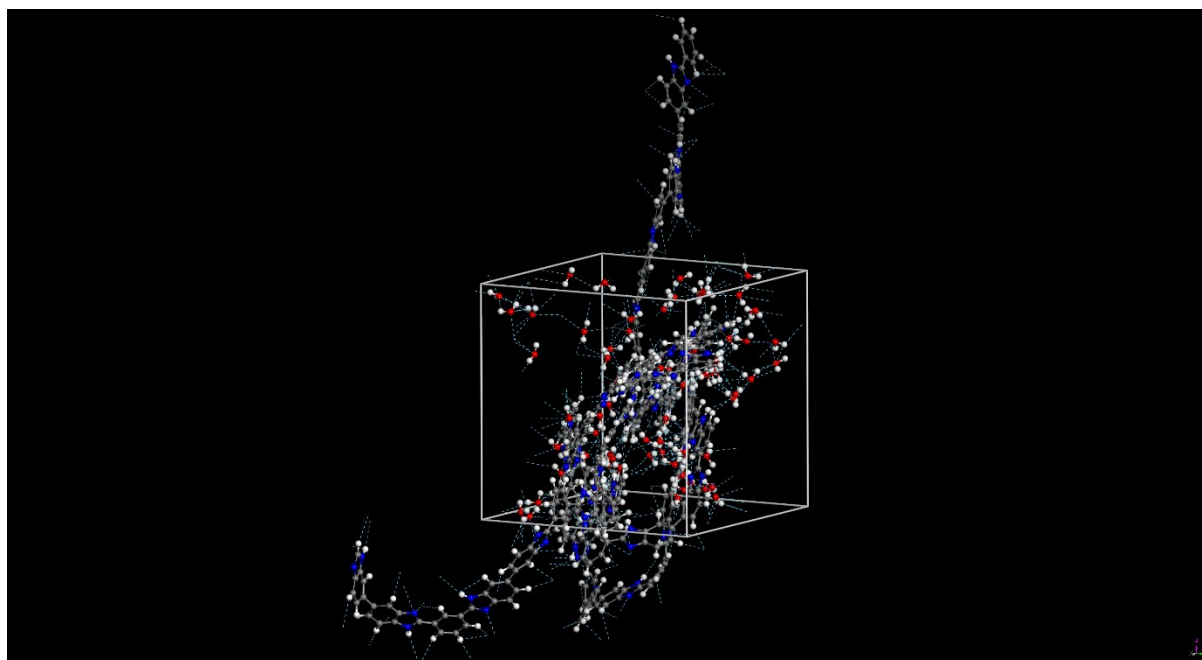

**Figure S10:** Hydrogen bond network formed in PBI-water cluster when water vapor activity  $a=0.8$ , snapshots from MD simulations showing the H-bonds.

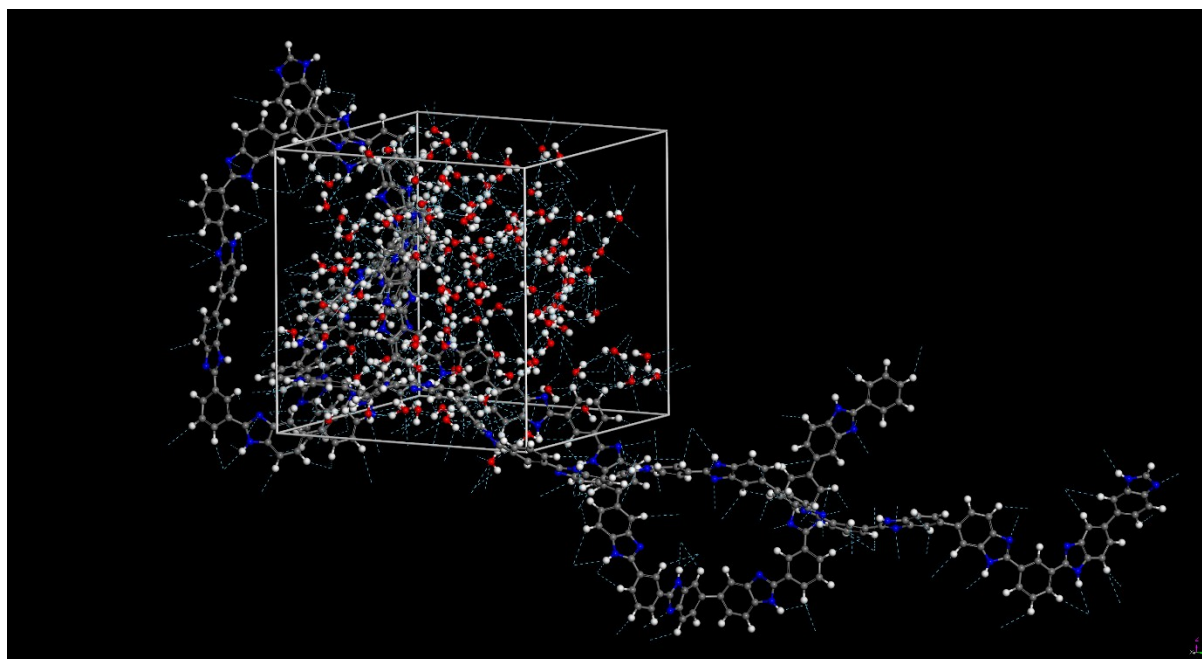

**Figure S11:** Hydrogen bond network formed in PBI-water cluster when water vapor activity  $a=0.95$ , snapshots from MD simulations showing the H-bonds.

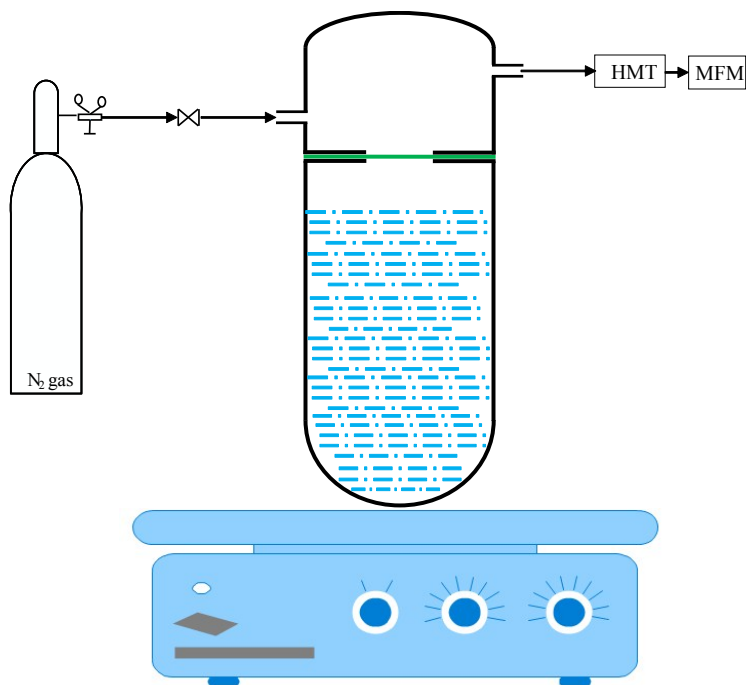

**Figure S12:** Schematic presentation of reactor used for esterification reaction. Humidity & temperature sensor (HMT) and mass flow meter (MFM).

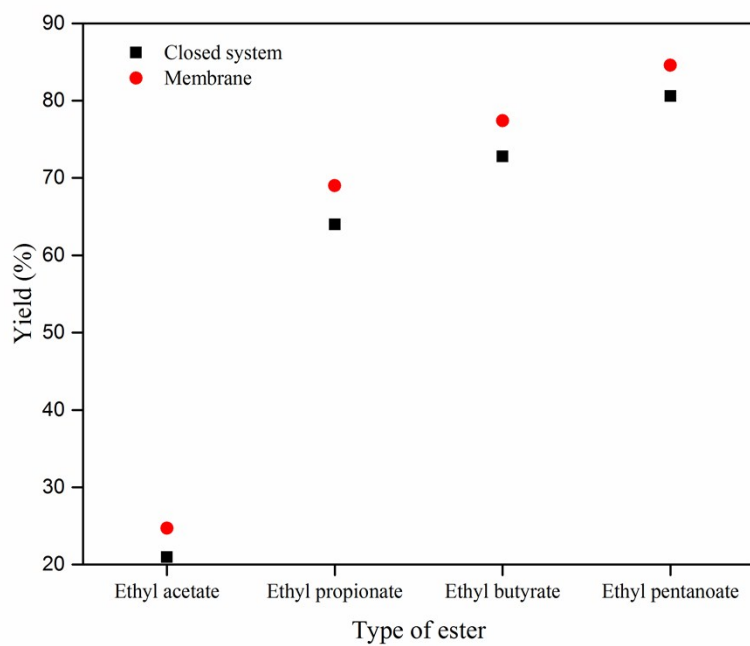

**Figure S13:** Effect of ester yield with membrane and with Al foil (closed system).

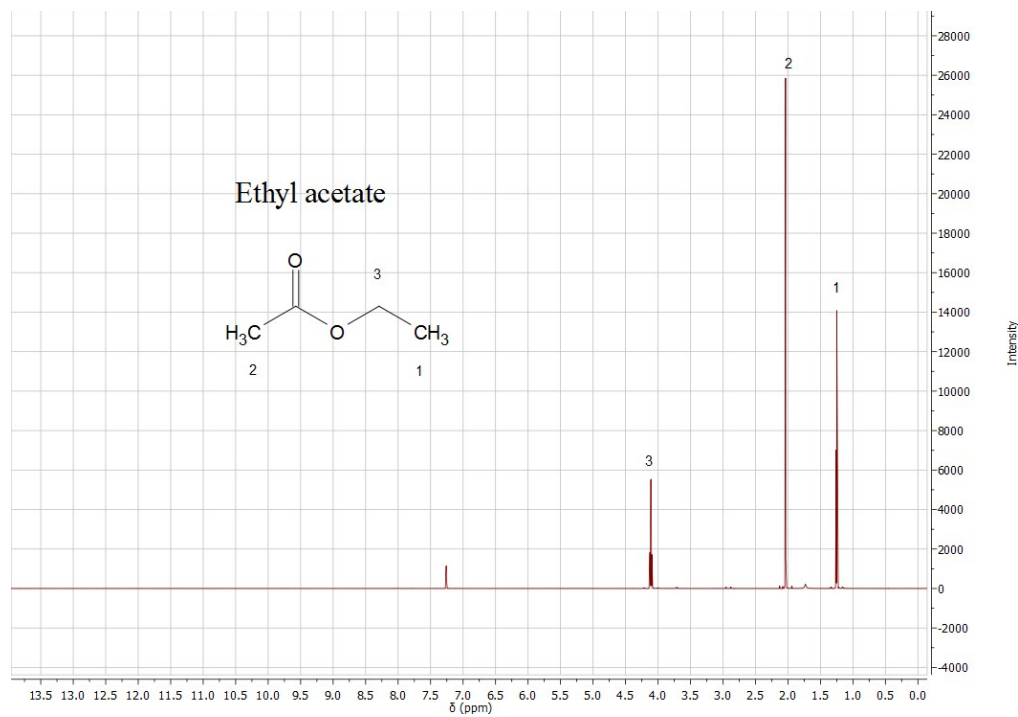

**Figure S14:**  $^1\text{H}$  NMR spectrum of ethyl acetate when Al foil was used.

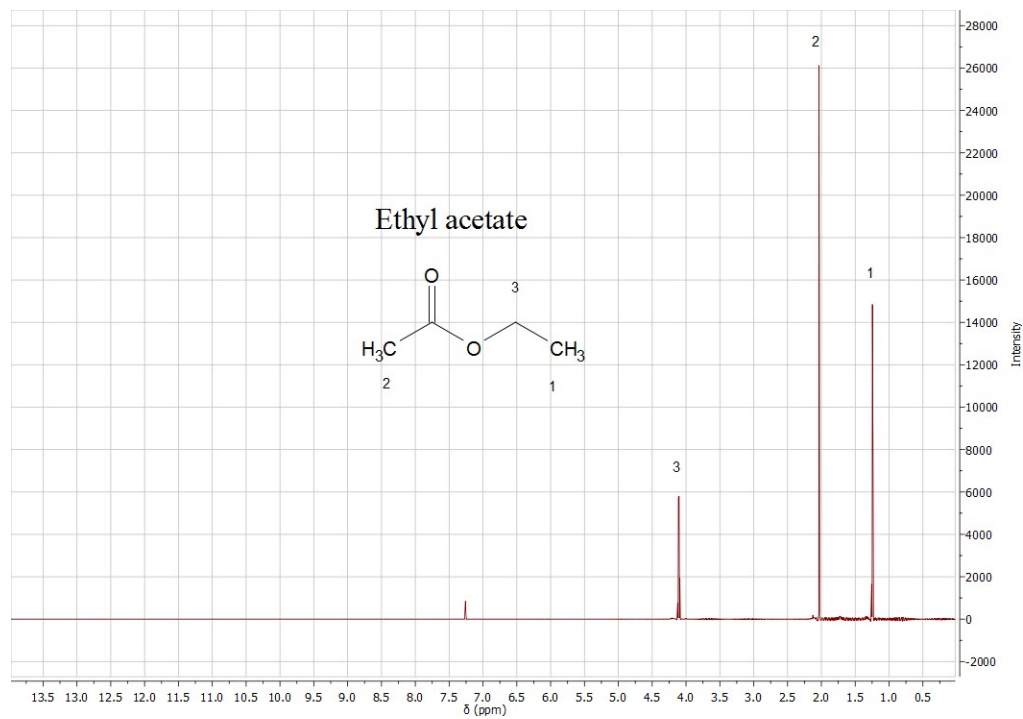

**Figure S15:**  $^1\text{H}$  NMR spectrum of ethyl acetate prepared using PBI membrane.

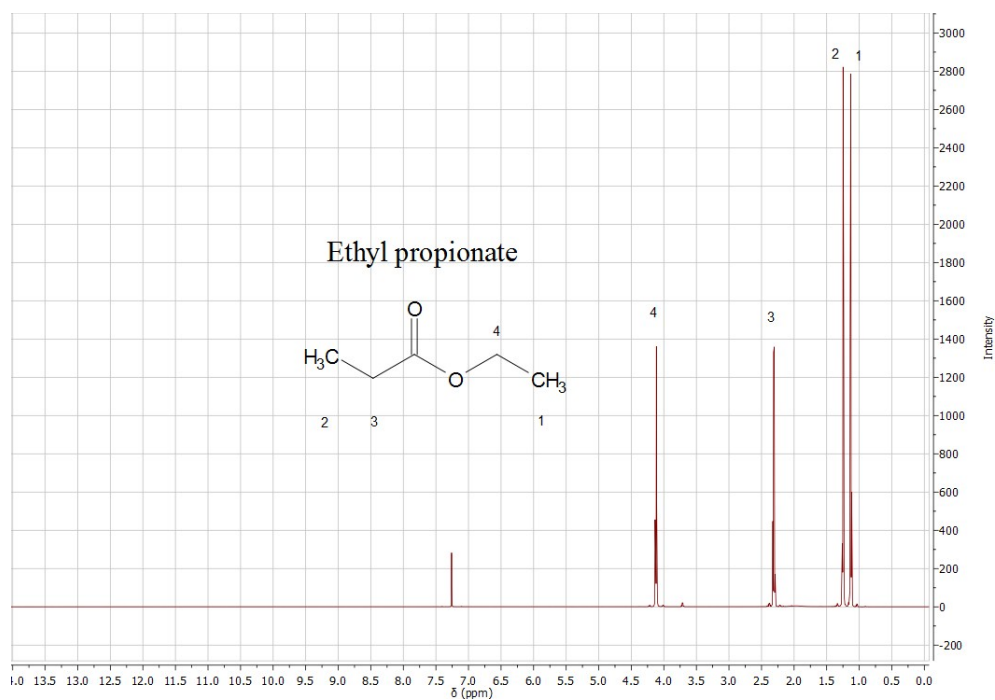

**Figure S16:** <sup>1</sup>H NMR spectrum of ethyl propionate prepared using PBI membrane.

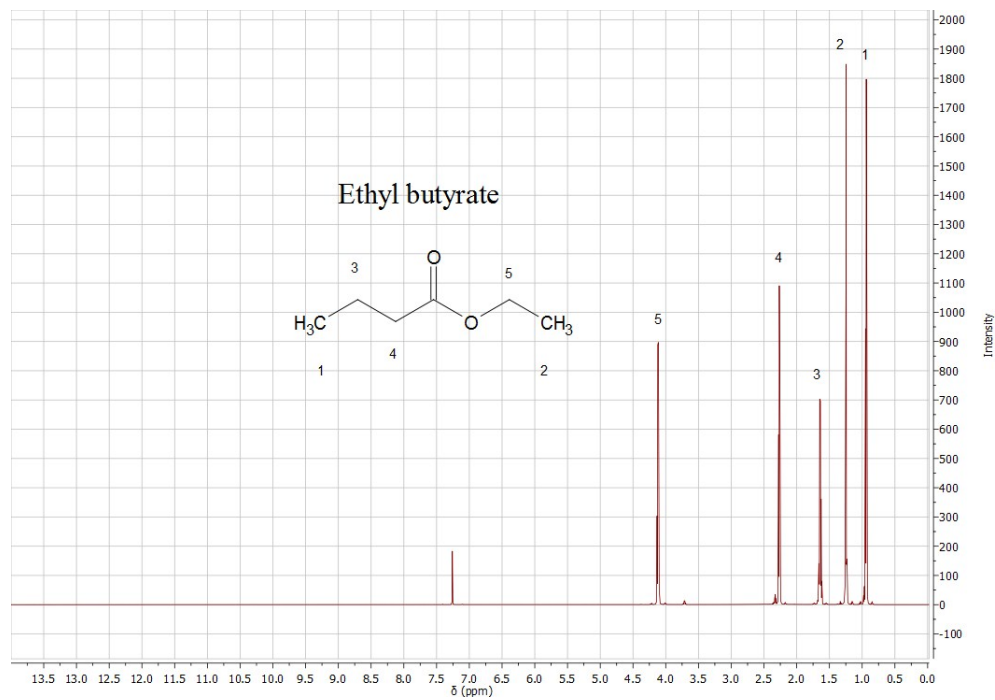

**Figure S17:** <sup>1</sup>H NMR spectrum of ethyl butyrate prepared using PBI membrane.

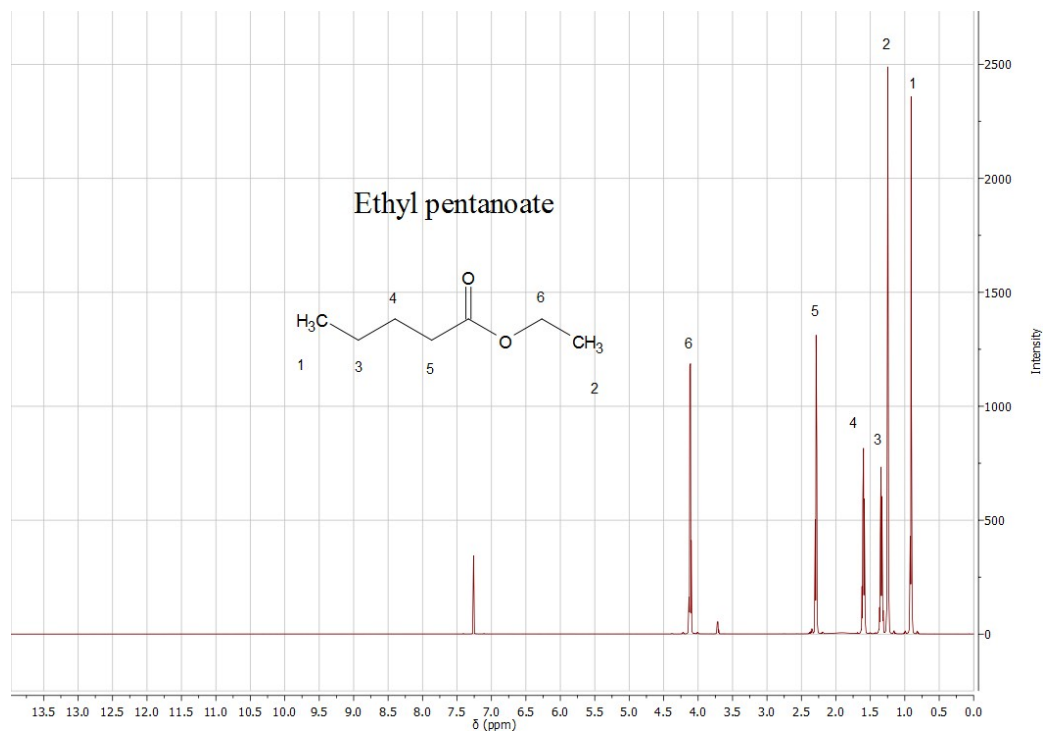

**Figure S18:**  $^1\text{H}$  NMR spectrum of ethyl pentanoate prepared using PBI membrane.

**Table S1:** Dual-mode parameters from Equation 7 for water sorption in PBI at 25 °C

| Activity range      | $K_D$ (cm <sup>3</sup> STP/cm <sup>3</sup> Poly.atm) | $b$ (atm <sup>-1</sup> ) | $C'_H$ (cm <sup>3</sup> STP/cm <sup>3</sup> Poly) |
|---------------------|------------------------------------------------------|--------------------------|---------------------------------------------------|
| Sorption<br>(0-0.6) | 11773.9±940.7                                        | 237.35±761.34            | 13.64±27.63                                       |

**Table S2:** Comparison of the performance of fabricated membranes with state-of-the-art membranes

| Sr. No. | Membrane material                    | Temperature (°C) | Water vapor permeance (GPU) | Water vapor permeability (Barrer) | Selectivity H <sub>2</sub> O/N <sub>2</sub>  | Ref.          |
|---------|--------------------------------------|------------------|-----------------------------|-----------------------------------|----------------------------------------------|---------------|
| 1       | PSU HFM                              | 32               | 529                         | -                                 | 50                                           | <sup>1</sup>  |
| 2       | [Emim][Tf <sub>2</sub> N]            | 31               | 635                         | $2.80 \times 10^5$                | $3.80 \times 10^3$                           | <sup>2</sup>  |
| 3       | Stabilized triethylene glycol        | 15-30            | 223                         | $1.50 \times 10^4$                | $2.0 \times 10^3$                            | <sup>3</sup>  |
| 4       | PSU/Si-TFC                           | 30               | $2.2 \times 10^3$           | 741                               | 500                                          | <sup>4</sup>  |
| 5       | PSU/ HFM PA TFC                      | 30               | $1.5 \times 10^3$           | 505                               | 500                                          | <sup>5</sup>  |
| 6       | PESU/PDA-TFC (polydopamine)          | 30               | $3.2 \times 10^3$           | -                                 | 195                                          | <sup>6</sup>  |
| 7       | PESU/PDA-TFC (polydopamine)          | 30               | $1.03 \times 10^3$          | 473                               | 35                                           | <sup>7</sup>  |
| 8       | PEI/Pebax <sup>®</sup> 1657          | 21               | $1.8 \times 10^3$           | $3.6 \times 10^3$                 | $1.8 \times 10^3$                            | <sup>8</sup>  |
| 9       | PESU/CA+PEG2000                      | 30               | 444                         | 444                               | 176                                          | <sup>9</sup>  |
| 10      | PSU/BA-TFC (3,5-diaminobenzoic acid) | 30               | $2.2 \times 10^3$           | 105                               | 34                                           | <sup>10</sup> |
| 11      | PSU/TFC-TiO <sub>2</sub>             | 30               | $1.1 \times 10^3$           | 282                               | 548                                          | <sup>11</sup> |
| 12      | PESU/TFC                             | 30               | $2.0 \times 10^3$           | 160                               | 119                                          | <sup>12</sup> |
| 13      | PSU/TFC-cTiO <sub>2</sub>            | 30               | $1.3 \times 10^3$           | 302                               | 486                                          | <sup>13</sup> |
| 14      | PSU/TFC-OH-TiO <sub>2</sub>          | 30               | $1.4 \times 10^3$           | 327                               | 510                                          | <sup>14</sup> |
| 15      | NaA zeolite/Ni sheet                 | 32               | $2.0 \times 10^4$           | $6.10 \times 10^4$                | 178<br>(H <sub>2</sub> O/air)                | <sup>15</sup> |
| 16      | PVA/LiCl-SS scaffold                 | 31               | $1.7 \times 10^3$           | $3.0 \times 10^5$                 | $2.8 \times 10^3$<br>(H <sub>2</sub> O/air)  | <sup>16</sup> |
| 17      | PVA/TiO <sub>2</sub> -SS scaffold    | 24               | $1.5 \times 10^3$           | -                                 | $5.78 \times 10^3$<br>(H <sub>2</sub> O/air) | <sup>17</sup> |

|    |                                                      |      |                   |                    |                    |        |
|----|------------------------------------------------------|------|-------------------|--------------------|--------------------|--------|
| 18 | Pebax® 1657/ GO (5-layer and 1.6% GO)                | 21   | $5.0 \times 10^3$ | $1.25 \times 10^4$ | $8.0 \times 10^4$  | 18     |
| 19 | Graphene oxide                                       | 30.8 | $3.0 \times 10^4$ | $1.82 \times 10^5$ | $1.0 \times 10^4$  | 19     |
| 20 | Pebax® 1074                                          | 21   | $3.2 \times 10^4$ | $1.6 \times 10^5$  | $2.0 \times 10^5$  | 20     |
| 21 | Polyactive<br>(PEO <sub>75</sub> PBT <sub>25</sub> ) | 30   | -                 | $1.4 \times 10^5$  | $5.0 \times 10^4$  | 21     |
| 22 | PSU/13X zeolite                                      | 30   | 127               | $1.45 \times 10^4$ | $1.04 \times 10^4$ | 22     |
| 23 | SPEEK                                                | 30   | -                 | $6.0 \times 10^4$  | $1.0 \times 10^7$  | 23, 24 |
| 24 | SPES                                                 | 30   | -                 | $1.5 \times 10^4$  | $2.11 \times 10^5$ | 25     |
| 25 | Polyether-polyurethane                               | 50   | $3.2 \times 10^3$ | $4.2 \times 10^4$  | 390                | 26     |
| 26 | Polyethylene                                         | -    | -                 | 12                 | 5.71               | 27     |
| 27 | Polyvinylalcohol                                     | -    | -                 | 19                 | $3.33 \times 10^4$ | 27     |
| 28 | Polypropylene                                        | -    | -                 | 68                 | 230                | 27     |
| 29 | Polystyrene                                          | -    | -                 | 970                | 400                | 27     |
| 30 | Cellulose acetate                                    | -    | -                 | $6.0 \times 10^3$  | $2.4 \times 10^4$  | 27     |
| 31 | Ethyl cellulose                                      | -    | -                 | $2.0 \times 10^4$  | $6.06 \times 10^3$ | 28     |
| 32 | Polyvinylchloride                                    | -    | -                 | 275                | $1.25 \times 10^4$ | 27     |
| 33 | Polyamide (PA-6)                                     | -    | -                 | 275                | $1.10 \times 10^4$ | 27     |
| 34 | Polycarbonate                                        | -    | -                 | 1400               | $4.7 \times 10^3$  | 27     |
| 35 | Polyphenyleneoxide                                   | -    | -                 | $4.1 \times 10^3$  | $1.07 \times 10^3$ | 27     |
| 36 | PDMS                                                 | -    | -                 | $4.0 \times 10^4$  | 140                | 27     |
| 37 | Polyimide (Kapton)                                   | -    | -                 | 640                | $5.3 \times 10^6$  | 27     |
| 38 | PAN                                                  | -    | -                 | 300                | $1.87 \times 10^6$ | 27     |
| 39 | Polysulfone                                          | -    | -                 | $2.0 \times 10^3$  | $8.0 \times 10^3$  | 27     |
| 40 | Natural rubber                                       | -    | -                 | $2.6 \times 10^3$  | 300                | 27     |
| 41 | Polyethersulfone                                     | -    | -                 | $2.62 \times 10^3$ | $1.05 \times 10^4$ | 25, 29 |
| 42 | PVA/TEG                                              | 30   | $4.8 \times 10^3$ | $1.43 \times 10^5$ | $3.0 \times 10^3$  | 30     |
| 43 | Poly(acrylamide-co-acrylic acid) (PAMAC)             | 35   | -                 | 109                | -                  | 31     |
| 44 | ETS-4 TFN                                            | 30   | $1.4 \times 10^3$ | 527                | 346                | 32     |

|    |                              |    |                    |                    |                    |               |
|----|------------------------------|----|--------------------|--------------------|--------------------|---------------|
| 45 | EVOH/EVA/EVOH                | 25 | -                  | $2.9 \times 10^3$  | $4.8 \times 10^4$  | <sup>33</sup> |
| 46 | PBI                          | 22 | $2.1 \times 10^3$  | $4.2 \times 10^4$  | $1.42 \times 10^6$ | This work     |
| 47 | PBI/1% TiO <sub>2</sub> NP   | 22 | $3.5 \times 10^3$  | $7.1 \times 10^4$  | $2.90 \times 10^6$ | This work     |
| 48 | PBI/1% cTiO <sub>2</sub> NP  | 22 | $3.55 \times 10^3$ | $7.11 \times 10^4$ | $3.05 \times 10^6$ | This work     |
| 49 | PBI/0.5% TiO <sub>2</sub> NT | 22 | $3.4 \times 10^3$  | $6.8 \times 10^4$  | $3.9 \times 10^6$  | This work     |

(PDMAEMA): poly(N,N-dimethylaminoethyl methacrylate)

(MMMs) composed of multiwalled carbon nanotubes (MWCNTs) dispersed in isotactic polypropylene (i-PP)

(PAMAC) poly (acrylamide-co-acrylic acid) composite

EVOH/EVA/EVOH: Poly (ethylene-co-vinyl alcohol)/ Poly (ethylene-co-vinyl acetate) three layer membranes



## References:

1. S. R. Auvil, J. S. Choe and L. J. Kellogg Jr, US Pat., 5259869A, 1993.
2. P. Scovazzo, *J. Membr. Sci.*, 2010, **355**, 7-17.
3. A. Ito, *J. Membr. Sci.*, 2000, **175**, 35-42.
4. M. I. Baig, P. G. Ingole, W. K. Choi, J.-d. Jeon, B. Jang, J. H. Moon and H. K. Lee, *Chem. Eng. J.*, 2017, **308**, 27-39.
5. M. I. Baig, P. G. Ingole, W. K. Choi, S. R. Park, E. C. Kang and H. K. Lee, *J. Taiwan Inst. Chem. Eng.*, 2016, **60**, 623-635.
6. P. G. Ingole, W. K. Choi, I.-H. Baek and H. K. Lee, *RSC Adv.*, 2015, **5**, 78950-78957.
7. S. H. Yun, P. G. Ingole, K. H. Kim, W. K. Choi, J. H. Kim and H. K. Lee, *Chem. Eng. J.*, 2014, **258**, 348-356.
8. H. Lin, S. M. Thompson, A. Serbanescu-Martin, J. G. Wijmans, K. D. Amo, K. A. Lokhandwala and T. C. Merkel, *J. Membr. Sci.*, 2012, **413**, 70-81.
9. K. Kim, P. G. Ingole, S. Yun, W. Choi, J. Kim and H. Lee, *J. Chem. Technol. Biotechnol.*, 2015, **90**, 1117-1123.
10. S. H. Yun, P. G. Ingole, W. K. Choi, J. H. Kim and H. K. Lee, *J. Mater. Chem. A*, 2015, **3**, 7888-7899.
11. P. G. Ingole, M. I. Baig, W. K. Choi and H. K. Lee, *J. Mater. Chem. A*, 2016, **4**, 5592-5604.
12. P. G. Ingole, W. K. Choi, G. B. Lee and H. K. Lee, *Desalination*, 2016.
13. M. I. Baig, P. G. Ingole, W. K. Choi, S. R. Park, E. C. Kang and H. K. Lee, *J. Membr. Sci.*, 2016, **514**, 622-635.
14. P. G. Ingole, M. I. Baig, W. Choi, X. An, W. K. Choi and H. K. Lee, *J. Ind. Eng. Chem.*, 2017, **48**, 5-15.
15. R. Xing, Y. Rao, W. TeGrotenhuis, N. Canfield, F. Zheng, D. W. Winiarski and W. Liu, *Chem. Eng. Sci.*, 2013, **104**, 596-609.
16. D. T. Bui, A. Nida, K. C. Ng and K. J. Chua, *J. Membr. Sci.*, 2016, **498**, 254-262.
17. T. D. Bui, F. Chen, A. Nida, K. J. Chua and K. C. Ng, *Sep. Purif. Rev.*, 2015, **144**, 114-122.
18. F. H. Akhtar, M. Kumar and K.-V. Peinemann, *J. Membr. Sci.*, 2017, **525**, 187-194.

19. Y. Shin, W. Liu, B. Schwenzer, S. Manandhar, D. Chase-Woods, M. H. Engelhard, R. Devanathan, L. S. Fifield, W. D. Bennett and B. Ginovska, *Carbon*, 2016.
20. H. Sijbesma, K. Nymeijer, R. van Marwijk, R. Heijboer, J. Potreck and M. Wessling, *J. Membr. Sci.*, 2008, **313**, 263-276.
21. S. J. Metz, W. Van De Ven, M. Mulder and M. Wessling, *J. Membr. Sci.*, 2005, **266**, 51-61.
22. A. Wolinska-Grabczyk, P. Kubica, A. Jankowski, M. Wojtowicz, J. Kansy and M. Wojtyniak, *J. Membr. Sci.*, 2016.
23. S. Liu, F. Wang and T. Chen, *Macromol. Rapid Commun.*, 2001, **22**, 579-582.
24. L. Jia, X. Xu, H. Zhang and J. Xu, *J. Appl. Polym. Sci.*, 1996, **60**, 1231-1237.
25. L. Jia, X. Xu, H. Zhang and J. Xu, *J. Polym. Sci., Part B: Polym. Phys.*, 1997, **35**, 2133-2140.
26. R. Huizing, W. Mérida and F. Ko, *J. Membr. Sci.*, 2014, **461**, 146-160.
27. S. P. Nunes and K. -V. Peinemann, *Membrane technology: In the chemical industry*, 2001, 39-67.
28. W. W. Ho and K. Sirkar, *Membrane Handbook*, Springer, New York, 1992.
29. S. Allen, M. Fujii, V. Stannett, H. Hopfenberg and J. Williams, *J. Membr. Sci.*, 1977, **2**, 153-163.
30. T. Bui, Y. Wong, K. Thu, S. Oh, M. Kum Ja, K. C. Ng, I. Raisul and K. Chua, *J. Appl. Polym. Sci.*, 2017, **134**.
31. S. Roy, C. M. Hussain and S. Mitra, *Sep. Purif. Rev.*, 2013, **107**, 54-60.
32. X. An, P. G. Ingole, W. K. Choi, H. K. Lee, S. U. Hong and J.-D. Jeon, *J. Membr. Sci.*, 2017, **531**, 77-85.
33. J. Soto Puente, K. Fatyeyeva, C. Chappey, S. Marais and E. Dargent, *ACS Appl. Mater. Inter.*, 2017, **9**, 6411-6423.
